# Supplementary material for: Faunistic and Structural Changes in Shallow Coastal Benthic Communities of the Ebre Delta (NW Mediterranean Sea)
Source: MDPI journal article supplement (doi:10.3390/d15050623), 2023-05-03
Supplement: s1 [file s1]

**Table S1:** Faunistic lists, percentage of occurrence (% OCC) and depth range (min, max) of all species collected.

|                                                           | 1992-93_%<br>OCC | 2016-17_%<br>OCC | min Depth (m) | max Depth (m) |
|-----------------------------------------------------------|------------------|------------------|---------------|---------------|
| <b>ANNELIDA</b>                                           |                  |                  |               |               |
| <b>Polychaeta</b>                                         | 0                | 4,8              | 20            | 20            |
| <i>Aphrodita aculeata</i> Linnaeus, 1758                  | 0                | 9,5              | 14            | 23            |
| <i>Ditrupa arietina</i> (O. F. Müller, 1776)              | 0                | 23,8             | 8             | 23            |
| <b>CHORDATA</b>                                           |                  |                  |               |               |
| <b>Ascidacea</b>                                          |                  |                  |               |               |
| <i>Ascidia mentula</i> Müller, 1776                       | 0                | 4,8              | 23            | 23            |
| Ascidacea Blainville, 1824                                | 0                | 28,6             | 14            | 23            |
| <i>Phallusia mammillata</i> (Cuvier, 1815)                | 0                | 4,8              | 23            | 23            |
| <b>Elasmobranchii</b>                                     |                  |                  |               |               |
| <i>Raja asterias</i> Delaroche, 1809                      | 0                | 4,8              | 17            | 17            |
| <i>Raja clavata</i> Linnaeus, 1758                        | 5,6              | 0                | 24            | 24            |
| <i>Raja polystigma</i> Regan, 1923                        | 0                | 9,5              | 6             | 8             |
| <i>Raja</i> sp. Linnaeus, 1758                            | 0                | 9,5              | 6             | 16            |
| <i>Torpedo torpedo</i> (Linnaeus, 1758)                   | 5,6              | 4,8              | 6             | 6             |
| <b>Teleostei</b>                                          |                  |                  |               |               |
| <i>Aphia minuta</i> (Risso, 1810)                         | 11,1             | 0                | 17            | 19            |
| <i>Apterichtus caecus</i> (Linnaeus, 1758)                | 11,1             | 0                | 6             | 24            |
| <i>Ariosoma balearicum</i> (Delaroche, 1809)              | 0                | 4,8              | 22            | 22            |
| <i>Arnoglossus kessleri</i> Schmidt, 1915                 | 0                | 9,5              | 6             | 6             |
| <i>Arnoglossus laterna</i> (Walbaum, 1792)                | 77,8             | 90,5             | 6             | 25            |
| <i>Arnoglossus thori</i> Kyle, 1913                       | 0                | 4,8              | 18            | 18            |
| <i>Boops boops</i> (Linnaeus, 1758)                       | 0                | 14,3             | 6             | 23            |
| <i>Callionymus risso</i> Lesueur, 1814                    | 44,4             | 100              | 6             | 24            |
| <i>Callionymus</i> sp. Linnaeus, 1758                     | 33,3             | 0                | 6             | 21            |
| <i>Cepola macrophthalma</i> (Linnaeus, 1758)              | 0                | 4,8              | 22            | 22            |
| <i>Chelidonichthys lucerna</i> (Linnaeus, 1758)           | 16,7             | 47,6             | 6             | 21            |
| <i>Chelidonichthys obscurus</i> (Walbaum, 1792)           | 5,6              | 33,3             | 14            | 22            |
| <i>Citharus linguatula</i> (Linnaeus, 1758)               | 22,2             | 33,3             | 16            | 24            |
| <i>Conger conger</i> (Linnaeus, 1758)                     | 16,7             | 0                | 17            | 25            |
| <i>Dalophis imberbis</i> (Delaroche, 1809)                | 5,6              | 4,8              | 17            | 24            |
| <i>Deltentosteus quadrimaculatus</i> (Valenciennes, 1837) | 11,1             | 4,8              | 17            | 24            |
| <i>Diplodus annularis</i> (Linnaeus, 1758)                | 5,6              | 0                | 24            | 24            |
| <i>Diplodus vulgaris</i> (Geoffroy Saint-Hilaire, 1817)   | 5,6              | 0                | 18            | 18            |
| <i>Echiichthys vipera</i> (Cuvier, 1829)                  | 5,6              | 0                | 6             | 6             |
| <i>Engraulis encrasicolus</i> (Linnaeus, 1758)            | 16,7             | 4,8              | 6             | 24            |
| Gobiidae Cuvier, 1816                                     | 27,8             | 0                | 6             | 24            |
| <i>Gobius niger</i> Linnaeus, 1758                        | 55,6             | 33,3             | 17            | 24            |
| <i>Gobius</i> sp. Linnaeus, 1758                          | 0                | 33,3             | 21            | 23            |
| <i>Hippocampus hippocampus</i> (Linnaeus, 1758)           | 5,6              | 14,3             | 6             | 8             |
| <i>Lepidorhombus boscii</i> (Risso, 1810)                 | 5,6              | 0                | 24            | 24            |
| <i>Lepidotrigla cavillone</i> (Lacepède, 1801)            | 0                | 38,1             | 14            | 23            |

|                                                     |      |      |    |    |
|-----------------------------------------------------|------|------|----|----|
| <i>Lepidotrigla dieuzeidei</i> Blanc & Hureau, 1973 | 0    | 4,8  | 17 | 17 |
| <i>Lesueurigobius friesii</i> (Malm, 1874)          | 66,7 | 0    | 17 | 25 |
| <i>Lesueurigobius suerii</i> (Risso, 1810)          | 0    | 81   | 14 | 24 |
| <i>Lithognathus mormyrus</i> (Linnaeus, 1758)       | 11,1 | 9,5  | 6  | 6  |
| <i>Merluccius merluccius</i> (Linnaeus, 1758)       | 16,7 | 14,3 | 17 | 24 |
| <i>Microchirus ocellatus</i> (Linnaeus, 1758)       | 0    | 4,8  | 14 | 14 |
| <i>Microchirus variegatus</i> (Donovan, 1808)       | 22,2 | 4,8  | 6  | 24 |
| <i>Monochirus hispidus</i> Rafinesque, 1814         | 38,9 | 52,4 | 6  | 24 |
| <i>Mullus barbatus</i> Linnaeus, 1758               | 38,9 | 9,5  | 14 | 24 |
| <i>Ophidion barbatum</i> Linnaeus, 1758             | 5,6  | 0    | 24 | 24 |
| <i>Ophisurus serpens</i> (Linnaeus, 1758)           | 0    | 4,8  | 6  | 6  |
| <i>Pagellus acarne</i> (Risso, 1827)                | 5,6  | 0    | 21 | 21 |
| <i>Pagellus bogaraveo</i> (Brünnich, 1768)          | 0    | 4,8  | 17 | 17 |
| <i>Pagellus erythrinus</i> (Linnaeus, 1758)         | 5,6  | 4,8  | 6  | 22 |
| <i>Pegusa lascaris</i> (Risso, 1810)                | 0    | 14,3 | 6  | 8  |
| <i>Pomadasys incisus</i> (Bowdich, 1825)            | 0    | 9,5  | 6  | 8  |
| <i>Pomatoschistus marmoratus</i> (Risso, 1810)      | 11,1 | 0    | 6  | 20 |
| <i>Pomatoschistus microps</i> (Krøyer, 1838)        | 0    | 4,8  | 6  | 6  |
| <i>Pomatoschistus</i> sp. Gill, 1863                | 5,6  | 9,5  | 8  | 17 |
| <i>Pseudaphya ferrerii</i> (de Buen & Fage, 1908)   | 16,7 | 9,5  | 22 | 25 |
| <i>Sardina pilchardus</i> (Walbaum, 1792)           | 11,1 | 0    | 6  | 25 |
| <i>Scophthalmus rhombus</i> (Linnaeus, 1758)        | 0    | 4,8  | 6  | 6  |
| <i>Scorpaena</i> sp. Linnaeus, 1758                 | 11,1 | 0    | 21 | 23 |
| <i>Serranus hepatus</i> (Linnaeus, 1758)            | 0    | 4,8  | 23 | 23 |
| <i>Solea senegalensis</i> Kaup, 1858                | 50   | 0    | 6  | 24 |
| <i>Solea solea</i> (Linnaeus, 1758)                 | 72,2 | 38,1 | 6  | 24 |
| Soleidae Bonaparte, 1833                            | 16,7 | 0    | 21 | 25 |
| <i>Sparus aurata</i> Linnaeus, 1758                 | 0    | 9,5  | 6  | 23 |
| <i>Symphurus nigrescens</i> Rafinesque, 1810        | 5,6  | 0    | 24 | 24 |
| <i>Synapturichthys kleinii</i> (Risso, 1827)        | 0    | 9,5  | 14 | 18 |
| <i>Trachinus draco</i> Linnaeus, 1758               | 0    | 33,3 | 14 | 23 |
| <i>Trigla lyra</i> Linnaeus, 1758                   | 5,6  | 0    | 6  | 6  |
| Triglidae Rafinesque, 1815                          | 0    | 9,5  | 23 | 23 |
| <i>Umbrina canariensis</i> Valenciennes, 1843       | 0    | 4,8  | 6  | 6  |
| <i>Uranoscopus scaber</i> Linnaeus, 1758            | 0    | 28,6 | 20 | 23 |

## CNIDARIA

### Anthozoa

|                                                     |   |      |    |    |
|-----------------------------------------------------|---|------|----|----|
| <i>Actinia</i> sp. Linnaeus, 1767                   | 0 | 14,3 | 20 | 23 |
| <i>Alcyonium palmatum</i> Pallas, 1766              | 0 | 38,1 | 17 | 23 |
| <i>Calliactis parasitica</i> (Couch, 1842)          | 0 | 14,3 | 16 | 23 |
| <i>Epizoanthus</i> sp. Gray, 1867                   | 0 | 81   | 6  | 24 |
| <i>Funiculina quadrangularis</i> (Pallas, 1766)     | 0 | 4,8  | 23 | 23 |
| <i>Pennatula phosphorea</i> Linnaeus, 1758          | 0 | 52,4 | 17 | 24 |
| <i>Pteroeides spinosum</i> (Ellis & Solander, 1786) | 0 | 38,1 | 17 | 24 |
| <i>Veretillum cynomorium</i> (Pallas, 1766)         | 0 | 4,8  | 22 | 22 |

## CRUSTACEA

**Decapoda**

|                                                                  |      |      |    |    |
|------------------------------------------------------------------|------|------|----|----|
| <i>Aegaeon cataphractus</i> (Olivi, 1792)                        | 61,1 | 61,9 | 6  | 25 |
| <i>Alpheus glaber</i> (Olivi, 1792)                              | 44,4 | 76,2 | 14 | 25 |
| <i>Anapagurus bicorniger</i> A. Milne-Edwards & Bouvier, 1892    | 44,4 | 28,6 | 14 | 25 |
| <i>Atelecyclus rotundatus</i> (Olivi, 1792)                      | 16,7 | 19   | 14 | 24 |
| <i>Atelecyclus undecimdentatus</i> (Herbst, 1783)                | 5,6  | 0    | 20 | 20 |
| <i>Carcinus aestuarii</i> Nardo, 1847                            | 16,7 | 0    | 6  | 6  |
| <i>Corystes cassivelaunus</i> (Pennant, 1777)                    | 33,3 | 9,5  | 6  | 24 |
| <i>Dardanus arrosor</i> (Herbst, 1796)                           | 61,1 | 76,2 | 14 | 25 |
| <i>Dardanus calidus</i> (Risso, 1827 in [Risso, 1826-1827])      | 16,7 | 28,6 | 14 | 25 |
| <i>Derilambrus angulifrons</i> (Latreille, 1825)                 | 22,2 | 81   | 6  | 24 |
| <i>Diogenes pugilator</i> (P. Roux, 1829)                        | 44,4 | 23,8 | 6  | 24 |
| <i>Ebalia tumefacta</i> (Montagu, 1808)                          | 0    | 9,5  | 23 | 24 |
| <i>Ethusa mascarone</i> (Herbst, 1785)                           | 0    | 14,3 | 14 | 24 |
| <i>Galathea intermedia</i> Lilljeborg, 1851                      | 11,1 | 9,5  | 20 | 24 |
| <i>Goneplax rhomboides</i> (Linnaeus, 1758)                      | 72,2 | 95,2 | 6  | 25 |
| <i>Ilia nucleus</i> (Linnaeus, 1758)                             | 33,3 | 66,7 | 6  | 25 |
| <i>Inachus communissimus</i> Rizza, 1839                         | 55,6 | 61,9 | 6  | 25 |
| <i>Inachus dorsettensis</i> (Pennant, 1777)                      | 0    | 9,5  | 22 | 22 |
| <i>Liocarcinus depurator</i> (Linnaeus, 1758)                    | 72,2 | 90,5 | 6  | 25 |
| <i>Liocarcinus maculatus</i> (Risso, 1827 in [Risso, 1826-1827]) | 72,2 | 95,2 | 6  | 25 |
| <i>Liocarcinus vernalis</i> (Risso, 1827 in [Risso, 1826-1827])  | 66,7 | 47,6 | 6  | 25 |
| <i>Macropodia tenuirostris</i> (Leach, 1814)                     | 0    | 9,5  | 17 | 17 |
| <i>Macropodia rostrata</i> (Linnaeus, 1761)                      | 55,6 | 28,6 | 6  | 25 |
| <i>Medorippe lanata</i> (Linnaeus, 1767)                         | 72,2 | 90,5 | 6  | 25 |
| <i>Paguristes eremita</i> (Linnaeus, 1767)                       | 72,2 | 4,8  | 16 | 25 |
| <i>Pagurus cuanensis</i> Bell, 1845                              | 61,1 | 95,2 | 6  | 25 |
| <i>Pagurus excavatus</i> (Herbst, 1791)                          | 50   | 66,7 | 16 | 24 |
| <i>Parthenopoides massena</i> (Roux, 1830 [in Roux, 1828-1830])  | 5,6  | 0    | 24 | 24 |
| <i>Penaeus kerathurus</i> (Forskål, 1775)                        | 94,4 | 100  | 6  | 25 |
| <i>Philocheras fasciatus</i> (Risso, 1816)                       | 11,1 | 14,3 | 6  | 8  |
| <i>Pilumnus spinifer</i> H. Milne Edwards, 1834                  | 11,1 | 4,8  | 17 | 22 |
| <i>Portunus hastatus</i> (Linnaeus, 1767)                        | 0    | 9,5  | 6  | 22 |
| <i>Processa</i> sp. Leach, 1815 [in Leach, 1815-1875]            | 16,7 | 28,6 | 6  | 24 |
| <i>Scyllarus arctus</i> (Linnaeus, 1758)                         | 5,6  | 4,8  | 23 | 24 |
| <i>Scyllarus pygmaeus</i> (Bate, 1888)                           | 0    | 4,8  | 22 | 22 |
| <i>Sicyonia carinata</i> (Brünnich, 1768)                        | 16,7 | 14,3 | 6  | 22 |
| <i>Solenocera membranacea</i> (Risso, 1816)                      | 5,6  | 14,3 | 23 | 25 |

**Stomatopoda**

|                                           |      |      |    |    |
|-------------------------------------------|------|------|----|----|
| <i>Rissoides desmaresti</i> (Risso, 1816) | 77,8 | 95,2 | 6  | 25 |
| <i>Squilla mantis</i> (Linnaeus, 1758)    | 5,6  | 0    | 18 | 18 |

**Thecostraca**

|                                               |     |   |    |    |
|-----------------------------------------------|-----|---|----|----|
| <i>Scalpellum scalpellum</i> (Linnaeus, 1767) | 5,6 | 0 | 24 | 24 |
|-----------------------------------------------|-----|---|----|----|

**ECHINODERMATA****Asteroidea**

|                                                |      |     |   |    |
|------------------------------------------------|------|-----|---|----|
| <i>Astropecten irregularis</i> (Pennant, 1777) | 44,4 | 100 | 6 | 24 |
|------------------------------------------------|------|-----|---|----|

**Echinoidea**

|                                                          |      |      |    |    |
|----------------------------------------------------------|------|------|----|----|
| <i>Brissopsis lyrifera</i> (Forbes, 1841)                | 0    | 14,3 | 22 | 23 |
| <i>Echinocyamus pusillus</i> (O.F. Müller, 1776)         | 0    | 4,8  | 24 | 24 |
| Echinoidea Leske, 1778                                   | 5,6  | 0    | 18 | 18 |
| <i>Ova canalifera</i> (Lamarck, 1816)                    | 0    | 33,3 | 14 | 23 |
| <i>Paracentrotus lividus</i> (Lamarck, 1816)             | 22,2 | 19   | 14 | 24 |
| <i>Psammechinus microtuberculatus</i> (Blainville, 1825) | 0    | 23,8 | 17 | 23 |
| <i>Spatangus purpureus</i> O.F. Müller, 1776             | 0    | 23,8 | 23 | 24 |
| <i>Sphaerechinus granularis</i> (Lamarck, 1816)          | 5,6  | 9,5  | 17 | 19 |

**Holoturoidea**

|                                                         |      |      |    |    |
|---------------------------------------------------------|------|------|----|----|
| <i>Holothuria</i> sp. Linnaeus, 1767                    | 16,7 | 38,1 | 6  | 23 |
| <i>Ocnus planci</i> (Brandt, 1835)                      | 0    | 14,3 | 17 | 22 |
| <i>Paraleptopentacta elongata</i> (Düben & Koren, 1846) | 0    | 23,8 | 22 | 24 |
| <i>Paraleptopentacta tergestina</i> (Sars, 1859)        | 0    | 19   | 17 | 22 |
| <i>Parastichopus regalis</i> (Cuvier, 1817)             | 5,6  | 0    | 21 | 21 |

**Ophiuroidea**

|                                               |     |      |   |    |
|-----------------------------------------------|-----|------|---|----|
| <i>Ophioderma</i> sp. Müller & Troschel, 1840 | 5,6 | 0    | 6 | 6  |
| <i>Ophiura ophiura</i> (Linnaeus, 1758)       | 50  | 42,9 | 6 | 24 |

**MOLLUSCA****Bivalvia**

|                                                            |      |      |    |    |
|------------------------------------------------------------|------|------|----|----|
| <i>Acanthocardia aculeata</i> (Linnaeus, 1758)             | 27,8 | 0    | 18 | 25 |
| <i>Acanthocardia echinata</i> (Linnaeus, 1758)             | 11,1 | 23,8 | 6  | 23 |
| <i>Acanthocardia paucicostata</i> (G. B. Sowerby II, 1834) | 22,2 | 66,7 | 14 | 24 |
| <i>Acanthocardia tuberculata</i> (Linnaeus, 1758)          | 55,6 | 0    | 6  | 24 |
| <i>Anadara corbuloides</i> (Monterosato, 1881)             | 0    | 47,6 | 17 | 23 |
| <i>Anomia ephippium</i> Linnaeus, 1758                     | 11,1 | 9,5  | 6  | 24 |
| Arcidae Lamarck, 1809                                      | 5,6  | 0    | 25 | 25 |
| <i>Bosemprella incarnata</i> (Linnaeus, 1758)              | 5,6  | 0    | 6  | 6  |
| <i>Callista chione</i> (Linnaeus, 1758)                    | 5,6  | 9,5  | 6  | 8  |
| <i>Chamelea gallina</i> (Linnaeus, 1758)                   | 61,1 | 19   | 6  | 25 |
| <i>Chlamys</i> sp. Röding, 1798                            | 16,7 | 9,5  | 18 | 24 |
| <i>Diplodonta rotundata</i> (Montagu, 1803)                | 5,6  | 0    | 6  | 6  |
| <i>Donax semistriatus</i> Poli, 1795                       | 22,2 | 19   | 6  | 23 |
| <i>Dosinia lupinus</i> (Linnaeus, 1758)                    | 0    | 9,5  | 6  | 8  |
| <i>Ensis ensis</i> (Linnaeus, 1758)                        | 5,6  | 0    | 6  | 6  |
| <i>Flexopecten flexuosus</i> (Poli, 1795)                  | 16,7 | 0    | 17 | 24 |
| <i>Flexopecten glaber</i> (Linnaeus, 1758)                 | 11,1 | 0    | 19 | 21 |
| <i>Glans trapezia</i> (Linnaeus, 1767)                     | 5,6  | 0    | 20 | 20 |
| <i>Glycymeris</i> sp. da Costa, 1778                       | 16,7 | 4,8  | 6  | 6  |
| <i>Macra stultorum</i> (Linnaeus, 1758)                    | 27,8 | 42,9 | 6  | 20 |
| <i>Mytillus galloprovincialis</i> Lamarck, 1819            | 16,7 | 0    | 18 | 24 |
| <i>Nucula sulcata</i> Bronn, 1831                          | 5,6  | 23,8 | 17 | 23 |
| Ostreidae Rafinesque, 1815                                 | 27,8 | 57,1 | 16 | 23 |
| <i>Pandora inaequalis</i> (Linnaeus, 1758)                 | 33,3 | 9,5  | 6  | 17 |
| <i>Pecten jacobaeus</i> (Linnaeus, 1758)                   | 27,8 | 0    | 17 | 24 |
| Pectinidae Rafinesque, 1815                                | 27,8 | 0    | 6  | 25 |

|                                                            |      |      |    |    |
|------------------------------------------------------------|------|------|----|----|
| <i>Peronaea planata</i> (Linnaeus, 1758)                   | 5,6  | 0    | 17 | 17 |
| <i>Peronidia albicans</i> (Gmelin, 1791)                   | 11,1 | 14,3 | 6  | 19 |
| <i>Polititapes rhomboides</i> (Pennant, 1777)              | 0    | 9,5  | 6  | 8  |
| <i>Pteria hirundo</i> (Linnaeus, 1758)                     | 0    | 4,8  | 23 | 23 |
| <i>Ruditapes decussatus</i> (Linnaeus, 1758)               | 11,1 | 0    | 6  | 6  |
| <i>Ruditapes</i> sp. Chiamenti, 1900                       | 5,6  | 0    | 6  | 6  |
| <i>Solecurtus candidus</i> (Brocchi, 1814)                 | 0    | 4,8  | 23 | 23 |
| <i>Spisula subtruncata</i> (da Costa, 1778)                | 66,7 | 28,6 | 6  | 24 |
| Tellinidae Blainville, 1814                                | 0    | 9,5  | 6  | 8  |
| <i>Venerupis</i> sp. Lamarck, 1818                         | 16,7 | 4,8  | 6  | 17 |
| <i>Venus nux</i> Gmelin, 1791                              | 0    | 76,2 | 16 | 24 |
| <i>Venus</i> sp. Linnaeus, 1758                            | 5,6  | 0    | 21 | 21 |
| <i>Venus thomassini</i> Fischer-Piette & Vukadinovic, 1977 | 5,6  | 0    | 18 | 18 |
| <i>Venus verrucosa</i> Linnaeus, 1758                      | 27,8 | 0    | 20 | 25 |

### Cephalopoda

|                                                       |      |      |    |    |
|-------------------------------------------------------|------|------|----|----|
| <i>Alloteuthis media</i> (Linnaeus, 1758)             | 50   | 28,6 | 17 | 24 |
| <i>Alloteuthis</i> sp. Wülker, 1920                   | 0    | 23,8 | 6  | 17 |
| <i>Alloteuthis subulata</i> (Lamarck, 1798)           | 0    | 4,8  | 17 | 17 |
| <i>Loligo vulgaris</i> Lamarck, 1798                  | 11,1 | 0    | 17 | 24 |
| <i>Octopus vulgaris</i> Cuvier, 1797                  | 27,8 | 4,8  | 6  | 23 |
| <i>Sepia officinalis</i> Linnaeus, 1758               | 83,3 | 52,4 | 6  | 25 |
| <i>Sepia orbignyana</i> Férussac [in d'Orbigny], 1826 | 0    | 42,9 | 6  | 23 |
| <i>Sepia</i> sp. Linnaeus, 1758                       | 0    | 4,8  | 23 | 23 |
| <i>Sepietta neglecta</i> Naef, 1916                   | 0    | 4,8  | 14 | 14 |
| <i>Sepietta obscura</i> Naef, 1916                    | 0    | 9,5  | 14 | 18 |
| <i>Sepiola affinis</i> Naef, 1912                     | 55,6 | 0    | 6  | 25 |
| <i>Sepiola intermedia</i> Naef, 1912                  | 0    | 23,8 | 14 | 18 |
| Sepiolidae Leach, 1817                                | 0    | 66,7 | 6  | 24 |

### Gastropoda

|                                                                 |      |      |    |    |
|-----------------------------------------------------------------|------|------|----|----|
| <i>Aglaja tricolorata</i> Renier, 1807                          | 0    | 9,5  | 14 | 18 |
| <i>Aporrhais pespelecani</i> (Linnaeus, 1758)                   | 72,2 | 85,7 | 14 | 25 |
| <i>Bivetiella cancellata</i> (Linnaeus, 1767)                   | 72,2 | 85,7 | 14 | 25 |
| <i>Bolinus brandaris</i> (Linnaeus, 1758)                       | 77,8 | 100  | 6  | 25 |
| <i>Calliostoma granulatum</i> (Born, 1778)                      | 50   | 85,7 | 14 | 25 |
| <i>Calyptraea chinensis</i> (Linnaeus, 1758)                    | 0    | 4,8  | 23 | 23 |
| <i>Cerithium alucastrum</i> (Brocchi, 1814)                     | 44,4 | 4,8  | 17 | 24 |
| <i>Euspira fusca</i> (Blainville, 1825)                         | 0    | 4,8  | 14 | 14 |
| <i>Euspira guilleminii</i> (Payraudeau, 1826)                   | 0    | 4,8  | 23 | 23 |
| <i>Galeodea echinophora</i> (Linnaeus, 1758)                    | 5,6  | 4,8  | 24 | 24 |
| <i>Galeodea rugosa</i> (Linnaeus, 1771)                         | 0    | 33,3 | 14 | 24 |
| <i>Gracilipurpura craticulata</i> (Bucquoy & Dautzenberg, 1882) | 5,6  | 0    | 17 | 17 |
| Heterobranchia Burmeister, 1837                                 | 16,7 | 0    | 6  | 6  |
| <i>Hexaplex trunculus</i> (Linnaeus, 1758)                      | 61,1 | 4,8  | 17 | 24 |
| <i>Naticarius hebraeus</i> (Martyn, 1786)                       | 33,3 | 14,3 | 6  | 24 |
| <i>Naticarius stercusmuscarum</i> (Gmelin, 1791)                | 0    | 47,6 | 8  | 23 |
| Naticidae Guilding, 1834                                        | 0    | 9,5  | 14 | 24 |

|                                                    |      |      |    |    |
|----------------------------------------------------|------|------|----|----|
| <i>Neverita josephinia</i> Risso, 1826             | 27,8 | 14,3 | 6  | 20 |
| <i>Nudibranchia</i> Cuvier, 1817                   | 27,8 | 95,2 | 6  | 24 |
| <i>Payraudeautia intricata</i> (Donovan, 1804)     | 16,7 | 0    | 6  | 6  |
| <i>Philine aperta</i> (Linnaeus, 1767)             | 0    | 9,5  | 14 | 18 |
| <i>Pleurotomoides gracilis</i> (Montagu, 1803)     | 0    | 4,8  | 23 | 23 |
| <i>Stramonita haemastoma</i> (Linnaeus, 1767)      | 5,6  | 0    | 17 | 17 |
| <i>Tectonatica sagraiana</i> (d'Orbigny, 1842)     | 11,1 | 0    | 6  | 6  |
| <i>Tritia mutabilis</i> (Linnaeus, 1758)           | 50   | 33,3 | 6  | 24 |
| <i>Tritia reticulata</i> (Linnaeus, 1758)          | 5,6  | 0    | 17 | 17 |
| <i>Tritia varicosa</i> (Turton, 1825)              | 38,9 | 4,8  | 6  | 24 |
| <i>Turritellinella tricarinata</i> (Brocchi, 1814) | 83,3 | 90,5 | 6  | 25 |
| <b>Scaphopoda</b>                                  |      |      |    |    |
| <i>Antalis inaequicostata</i> (Dautzenberg, 1891)  | 27,8 | 28,6 | 14 | 24 |
| <b>PORIFERA</b>                                    |      |      |    |    |
| Porifera Grant, 1836                               | 0    | 23,8 | 16 | 23 |
